# Supplementary material
Source: HighWire-hosted journal article supplement (https://bmjopenquality.bmj.com/content/7/1/e000278)
Supplement: inline-supplementary-material-2 [file inline-supplementary-material-2.pdf]

SURGICAL / ORTHOPAEDIC / TRAUMA DIRECTORATE

*\*delete as appropriate*

*addressograph label*

WEEKEND HANDOVER

PRIMARY / WORKING DIAGNOSIS

PROCEDURE

DATE

PLAN

DISCHARGE WHEN?

POTENTIAL COMPLICATIONS & ACTION REQUIRED

Is resuscitation appropriate?.....

Is ITU appropriate? .....

RESULTS TO BE CHECKED (please state)

bloods:

radiology:

other:

SIGNED

DATE

/ /

BLEEP NO.

PRINT NAME
